# Supplementary material
Source: publisher figshare collection journal article supplement (https://acs.figshare.com/ndownloader/files/10036012)

# SUPPORTING INFORMATION

## Merging Icosahedral Boron Clusters and Magnetic Nanoparticles: Aiming towards Multifunctional Nanohybrids Materials.

Elena Oleshkevich,<sup>a</sup> Francesc Teixidor,<sup>a</sup> Anna Rosell<sup>b</sup> and Clara Viñas<sup>a,\*</sup>

<sup>a</sup> *Institut de Ciència de Materials de Barcelona (ICMAB-CSIC), Campus UAB, 08193 Bellaterra, Spain.*

<sup>b</sup> *Neurovascular Research Laboratory, Vall d'Hebron Research Institute, Universitat Autònoma de Barcelona, Passeig Vall d'Hebron 119-129, 08035 Barcelona, Spain.*

**Redox titration analysis.**

**Geometry calculations.**

**Surface coverage values calculations.**

**Figure S1.** Particle size distribution histograms from three batches of freshly prepared **1**-MNPs, prepared following the same synthesis, and mean particle size diameter.

**Figure S2.** X-ray diffraction patterns corresponding to **1**-MNPs (black) and the typical magnetite/maghemite spinel structure (red).

**Figure S3.** a) Images of **1**-MNP colloidal suspension in water at different pH. b) DLS studies in water at different pH.

**Figure S4.** <sup>1</sup>H-NMR, <sup>1</sup>H{<sup>11</sup>B}-NMR, <sup>11</sup>B-NMR, <sup>11</sup>B{<sup>1</sup>H}-NMR, <sup>31</sup>P-NMR spectra of the mother liquor after **1**-MNPs sterilization. Spectra were run in D<sub>2</sub>O.

**Figure S5.** Thermogravimetric Analysis of the ligand Na[**1**] and the **1**-MNP.

### Redox titration analysis.

The ratio of  $\text{Fe}^{2+}$  and  $\text{Fe}^{3+}$  ions forming **1**-MNPs nanoparticle core was determined by redox titration analysis.

Samples of freshly prepared **1**-MNPs: Powder samples of **1**-MNPs (about 0.5 mg) before sterilization were decomposed in 0.1 mL HCl (37 wt.%) and diluted to 1mL by Milli-Q water giving a yellowish solution (with  $\text{Fe}^{2+}$  and  $\text{Fe}^{3+}$  ions).

Preparation of the **1**-MNPs samples after sterilization: About 0.1 mL HCl (37 wt.%) was added to 1 mL of **1**-MNPs suspensions after sterilization to decompose the nanoparticles.

In both samples, each of the obtained clear yellow solutions was analyzed by titration with  $\text{K}_2\text{Cr}_2\text{O}_7$  (oxidizing solution) (5 mM). To know the end point of titration (oxidation of all  $\text{Fe}^{2+}$  to  $\text{Fe}^{3+}$ ) the indicator sodium diphenylamine sulphonate was added to the prepared solution. The  $\text{Fe}^{2+}$  content was determined by the first titration. Then by addition of  $\text{SnCl}_2$  (reductive agent)  $\text{Fe}^{3+}$  was reduced to  $\text{Fe}^{2+}$ . The total iron content  $\text{Fe}^{2+/3+}$  was determined by the second titration. The  $\text{Fe}^{3+}$  content was calculated as follows:  $\text{Fe}^{2+/3+}_{\text{content}} - \text{Fe}^{2+}_{\text{content}}$ . Titration was done in triplicate (n=3).

*Before sterilization:*

| n    | $\text{W}_{1\text{-MNPs}}$ ,<br>$\mu\text{g}$ | $\text{Fe}^{2+}$ content,<br>wt.% $_{\text{Fe}^{2+}/\text{totFe}}$ | $\text{Fe}^{3+}$ content,<br>wt.% $_{\text{Fe}^{3+}/\text{totFe}}$ |
|------|-----------------------------------------------|--------------------------------------------------------------------|--------------------------------------------------------------------|
| 1    | 540                                           | 23.57                                                              | 76.43                                                              |
| 2    | 528                                           | 26.67                                                              | 73.33                                                              |
| 3    | 546                                           | 25.00                                                              | 75.00                                                              |
| MEAN | 538                                           | 25.08                                                              | 74.92                                                              |

25.08 % of  $\text{Fe}^{2+}$  content corresponds to magnetite/maghemite ratio  $2\text{Fe}_3\text{O}_4\cdot\text{Fe}_2\text{O}_3$  ( $\text{Fe}_8\text{O}_{11}$ ).

*After sterilization in 1mL of suspension of 1-MNPs:*

| n    | $\text{Fe}^{2+}$ content,<br>wt.% $_{\text{Fe}^{2+}/\text{totFe}}$ | $\text{Fe}^{3+}$ content,<br>wt.% $_{\text{Fe}^{3+}/\text{totFe}}$ |
|------|--------------------------------------------------------------------|--------------------------------------------------------------------|
| 1    | 14.31                                                              | 85.69                                                              |
| 2    | 15.94                                                              | 84.05                                                              |
| 3    | 13.89                                                              | 86.11                                                              |
| MEAN | 14.71                                                              | 85.28                                                              |

14.71 % of  $\text{Fe}^{2+}$  content corresponds to magnetite/maghemite ratio  $\text{Fe}_3\text{O}_4\cdot 2\text{Fe}_2\text{O}_3$  ( $\text{Fe}_7\text{O}_{10}$ )

## Geometry calculations

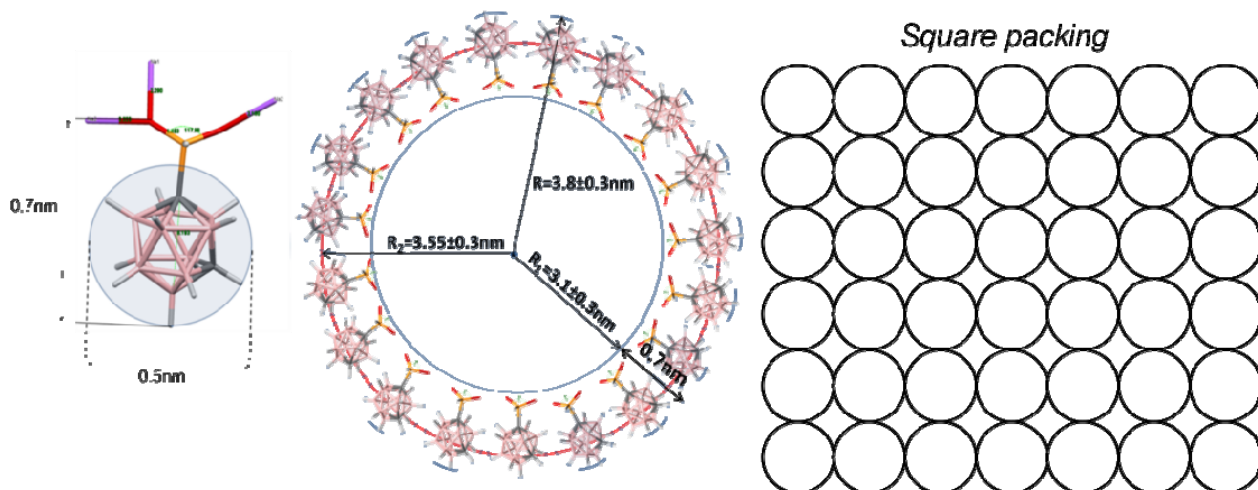

$$R_2 = 3.55 \pm 0.3 \text{ nm}$$

$$A_2 = 4\pi R_2^2 = 132.732 \div 186.265 \text{ nm}^2 (158 \pm 27 \text{ nm}^2)$$

$$\text{For square packing: } A_{[\text{carboranylphosphate}]} = 0.5 \times 0.5 = 0.25 \text{ nm}^2$$

$n_{\max} = A_2 / A_{[\text{carboranylphosphate}]} = 530.928 \div 745.060 (638 \pm 107)$  – maximum number of *meta*-carboranylphosphates that can fit one nanoparticle with core diameter of  $6.2 \pm 0.6 \text{ nm}$ .

## Surface coverage values calculations.

Energy Dispersive X-ray (EDX) analysis of **1**-MNPs before sterilization was performed for 3 ( $n = 3$ ) bathes, prepared following the same synthesis. Average:

Fe 92,89 (At%) – 13 Fe

P 7.11 (At%) – 1 P

Fe:P = 13:1

For freshly prepared **1**-MNPs the core composition is  $2\text{Fe}_3\text{O}_4 \cdot \text{Fe}_2\text{O}_3 (\text{Fe}_8\text{O}_{11})$ .

$\text{Fe}_8\text{O}_{11} : \text{C}_2\text{B}_{10}\text{H}_{11}\text{-P(H)OO}^- = 1.625 : 1$

(from geometry calculations)  $d = 6.2 \pm 0.6 \text{ nm}$  - diameter of nanoparticle core.

$$m_{\text{MNPs}} = (1/6)\pi d^3 \rho_{\text{MNPs}} = (66.4 \pm 19) \text{E-20 g} \quad (\text{taking the density of magnetite to be } \rho_{\text{Magnetite}} = 5.175 \text{ g/cm}^3 \text{ according to } \text{https://www.mindat.org/min-2538.html}).$$

$\text{Mole}_{\text{MNPs}} = m_{\text{MNPs}} / M_{2\text{Fe}_3\text{O}_4 \cdot \text{Fe}_2\text{O}_3} = N_{\text{Fe}_8\text{O}_{11}} / N_A$ , where  $M_{\text{Fe}_8\text{O}_{11}} = 622.75 \text{ g/mol}$  is molecular weight of magnetite/maghemite couple  $2\text{Fe}_3\text{O}_4 \cdot \text{Fe}_2\text{O}_3$ ,  $N_{\text{Fe}_8\text{O}_{11}}$  – number of  $\text{Fe}_8\text{O}_{11}$  units that contain one nanoparticle core with diameter  $6.2 \pm 0.6 \text{ nm}$ .

$$N_{\text{Fe}_8\text{O}_{11}} = m_{\text{MNPs}} N_A / M_{\text{Fe}_8\text{O}_{11}} = 642 \pm 182 \text{ Fe}_8\text{O}_{11} / \text{NP}$$

Taking into account EDX results before sterilization,  $\text{Fe}_8\text{O}_{11} : \text{C}_2\text{B}_{10}\text{H}_{11}\text{-P(H)OO}^- = 1.625 : 1$ , each nanoparticle bears  $n_{[\text{carboranylphosphate}]} = N_{\text{Fe}_8\text{O}_{11}} / 1.625 = 395 \pm 112$  *meta*-carboranylphosphinates.

The saturation of surface of the nanoparticles core (%)  $S_{CBP} = n_{[\text{carboranylphosphate}]} / n_{\text{max}} \cdot 100\% = 61.29 \pm 7.43 \%$ .

$$S_{[\text{carboranylphosphate}]}(\text{ICP}) = \mathbf{61.29 \pm 7.43}$$

$$\%, n_{CBP} = \mathbf{395 \pm 112 \text{ CBP/NP}}$$

Energy Dispersive X-ray (EDX) analysis of **1**-MNPs after sterilization was performed for 3 (n = 3) bathes, prepared following the same synthesis. Average:

Fe 55,34 (At%) – 70 Fe

P 0.79 (At%) – 1 P

Fe:P = 70:1

For **1**-MNPs after sterilization the core composition is  $\text{Fe}_3\text{O}_4 \cdot 2\text{Fe}_2\text{O}_3$  ( $\text{Fe}_7\text{O}_{10}$ ).

$\text{Fe}_7\text{O}_{10} : \text{C}_2\text{B}_{10}\text{H}_{11}\text{-P(H)OO}^- = 10 : 1$ .  $\text{Mole}_{\text{MNPs}} = m_{\text{MNPs}} / M_{\text{Fe}_7\text{O}_{10}} = N_{\text{Fe}_7\text{O}_{10}} / N_A$ , where  $M_{\text{Fe}_7\text{O}_{10}} = 550.91$  g/mol is molecular weight of magnetite/maghemite couple  $\text{Fe}_7\text{O}_{10}$ ,  $N_{\text{Fe}_7\text{O}_{10}}$  – number of  $\text{Fe}_7\text{O}_{10}$  units that contain one nanoparticle core with diameter  $6.2 \pm 0.6$  nm.

$$N_{\text{Fe}_7\text{O}_{10}} = m_{\text{MNPs}} N_A / M_{\text{Fe}_7\text{O}_{10}} = 726 \pm 205 \text{ Fe}_7\text{O}_{10} / \text{NP}$$

Taking into account EDX results after sterilization,  $\text{Fe}_7\text{O}_{10} : \text{C}_2\text{B}_{10}\text{H}_{11}\text{-P(H)OO}^- = 10 : 1$ , each nanoparticle bears  $n_{[\text{carboranylphosphate}]} = 73 \pm 21$  *meta*-carboranylphosphinates. The saturation of surface of the nanoparticles core (%)  $S_{[\text{carboranylphosphate}]} = n_{[\text{carboranylphosphate}]} / n_{\text{max}} \cdot 100\% = 11.21 \pm 1.41 \%$ .

$$S_{[\text{carboranylphosphate}]}(\text{ICP}) = \mathbf{11.21 \pm 1.41 \%}.$$

$$\%, n_{[\text{carboranylphosphate}]}(\text{ICP}) = \mathbf{73 \pm 21 [\text{carboranylphosphate}]/\text{NP}}$$

**Figure S1.** Particle size distribution histograms from three batches of freshly prepared 1-MNPs, prepared following the same synthesis, and mean particle size diameter.

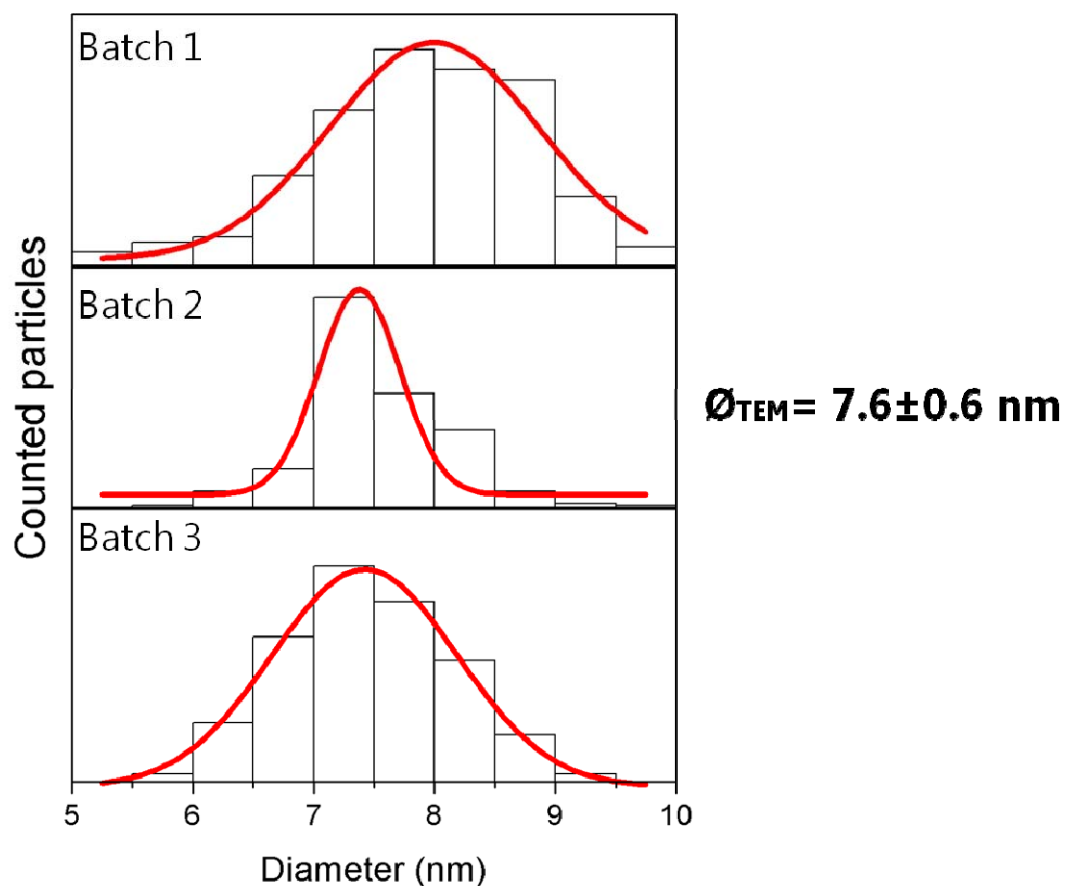

**Figure S2.** X-ray diffraction patterns corresponding to 1-MNPs (black) and the typical magnetite/maghemite spinel structure (red).

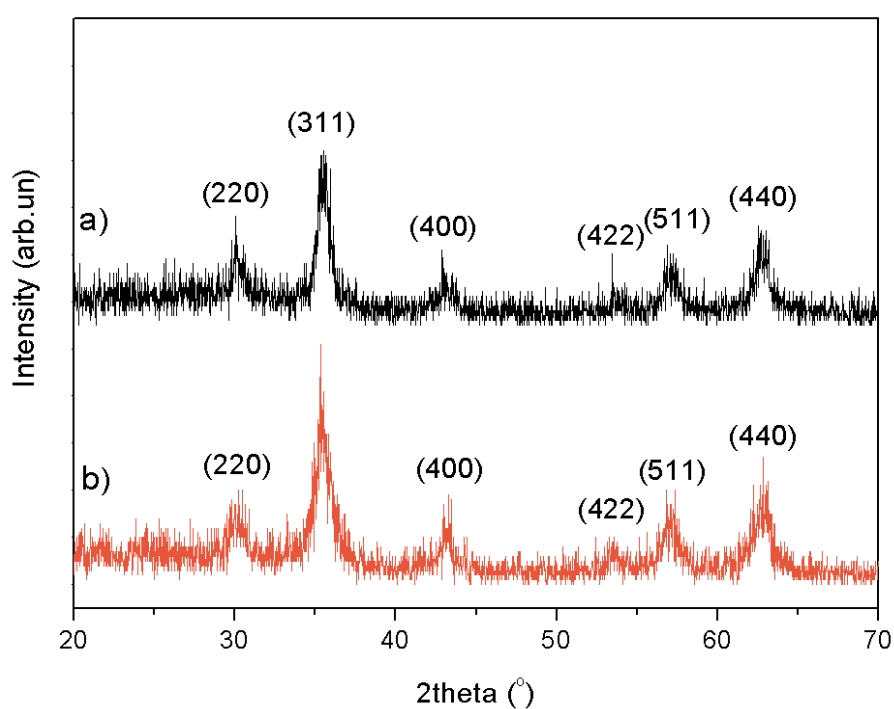

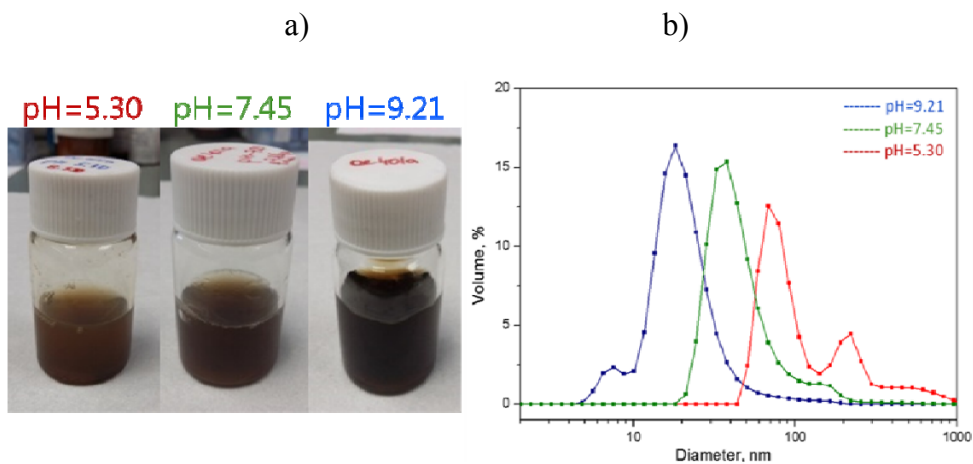

**Figure S4.**  $^1\text{H}$ -NMR,  $^1\text{H}\{^{11}\text{B}\}$ -NMR,  $^{11}\text{B}$ -NMR,  $^{11}\text{B}\{^1\text{H}\}$ -NMR,  $^{31}\text{P}$ -NMR spectra of the mother liquor after **1**-MNPs sterilization. Spectra were run in  $\text{D}_2\text{O}$ .

$^1\text{H}$ -NMR

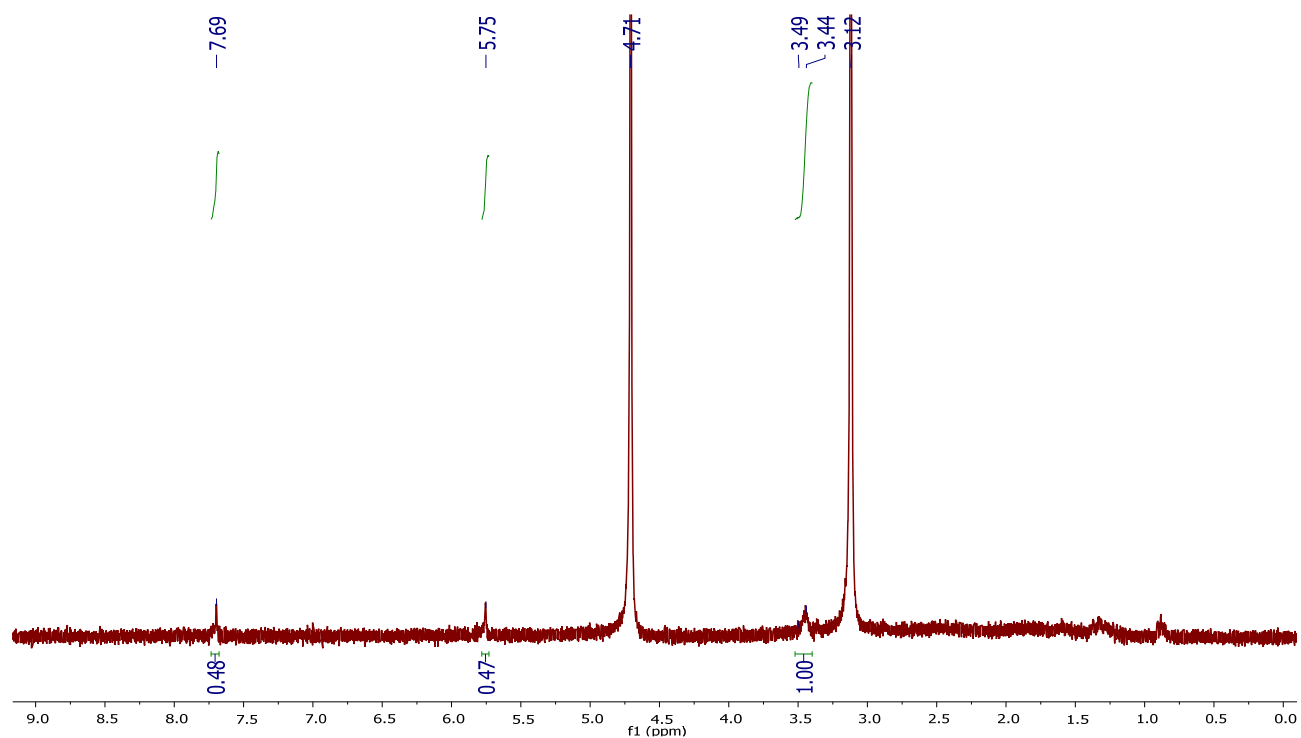

$^1\text{H}\{^{11}\text{B}\}$ -NMR

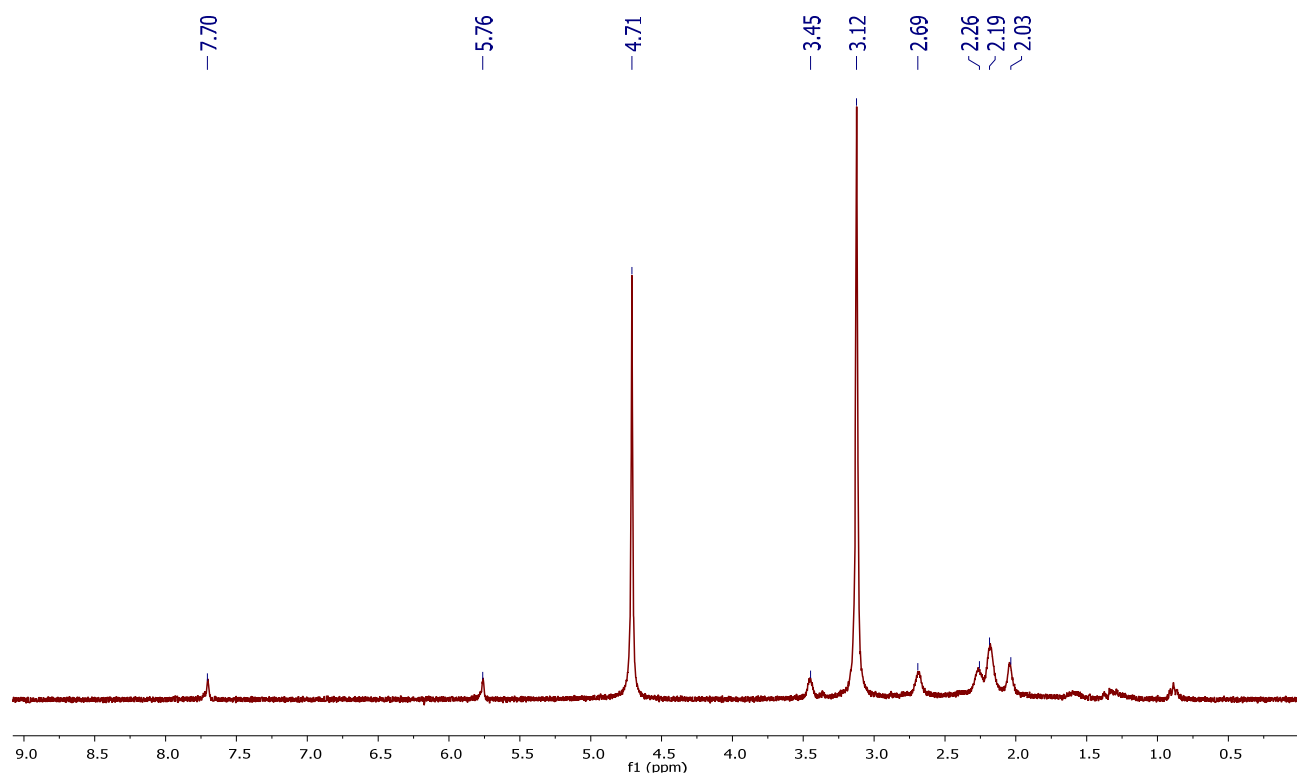

$^{11}\text{B}\{^1\text{H}\}$ -NMR

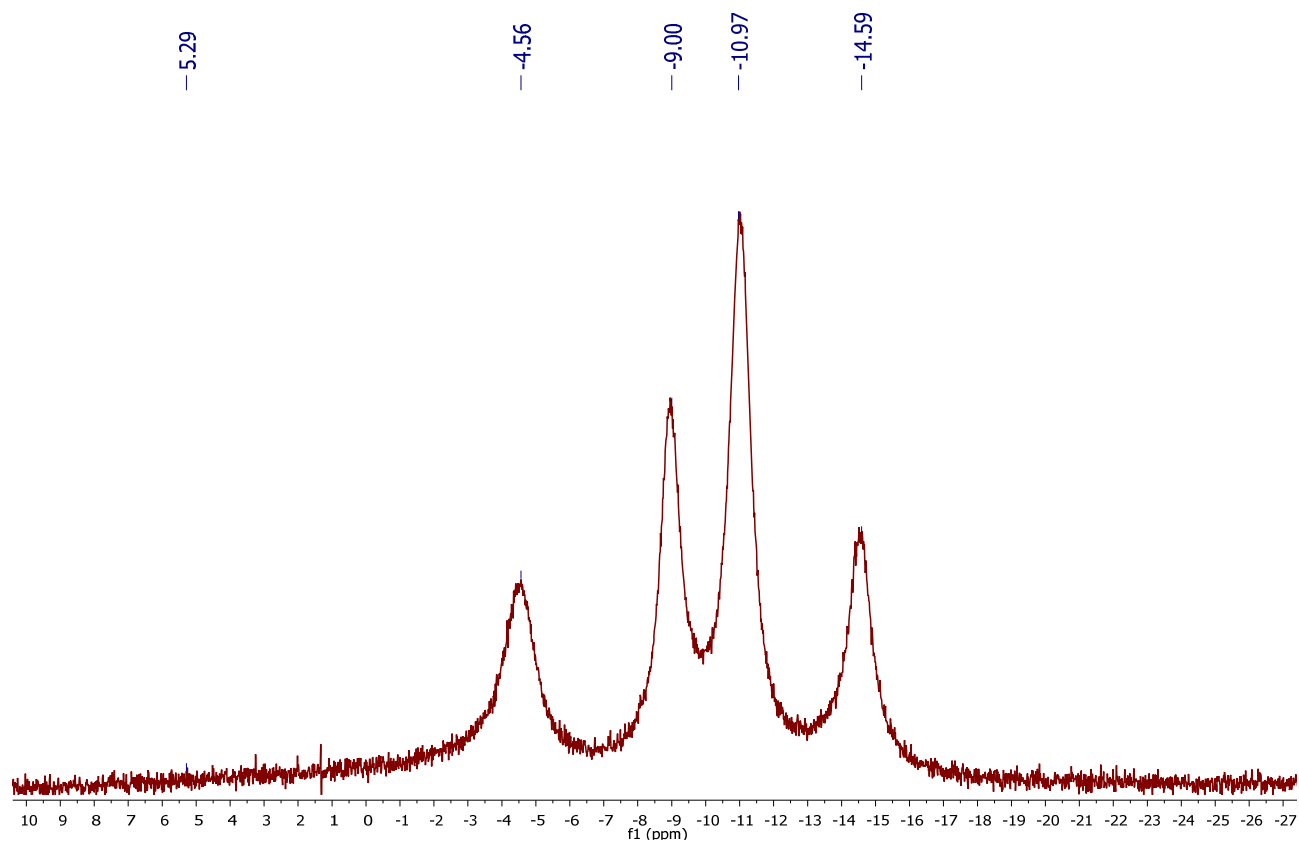

$^{11}\text{B}$ -NMR

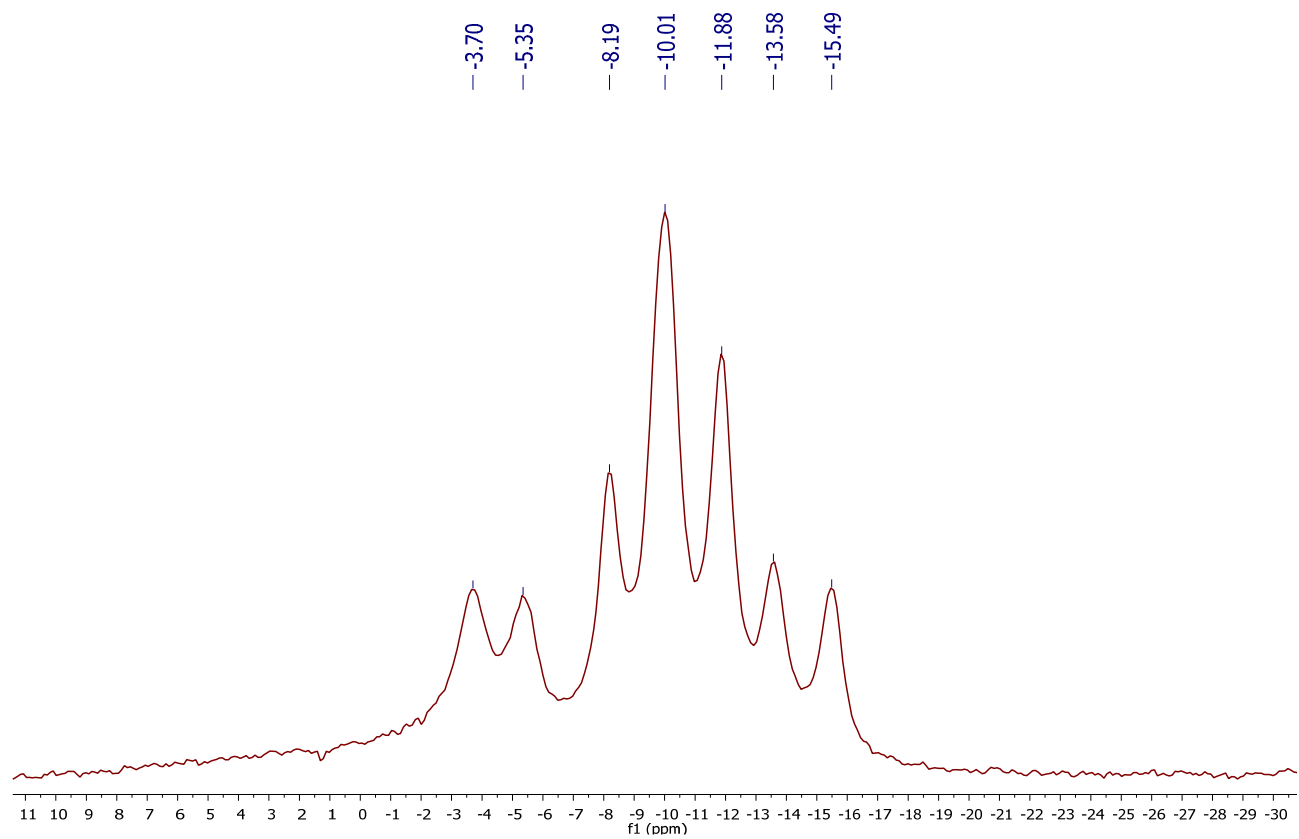



$^{31}\text{P}$ -NMR

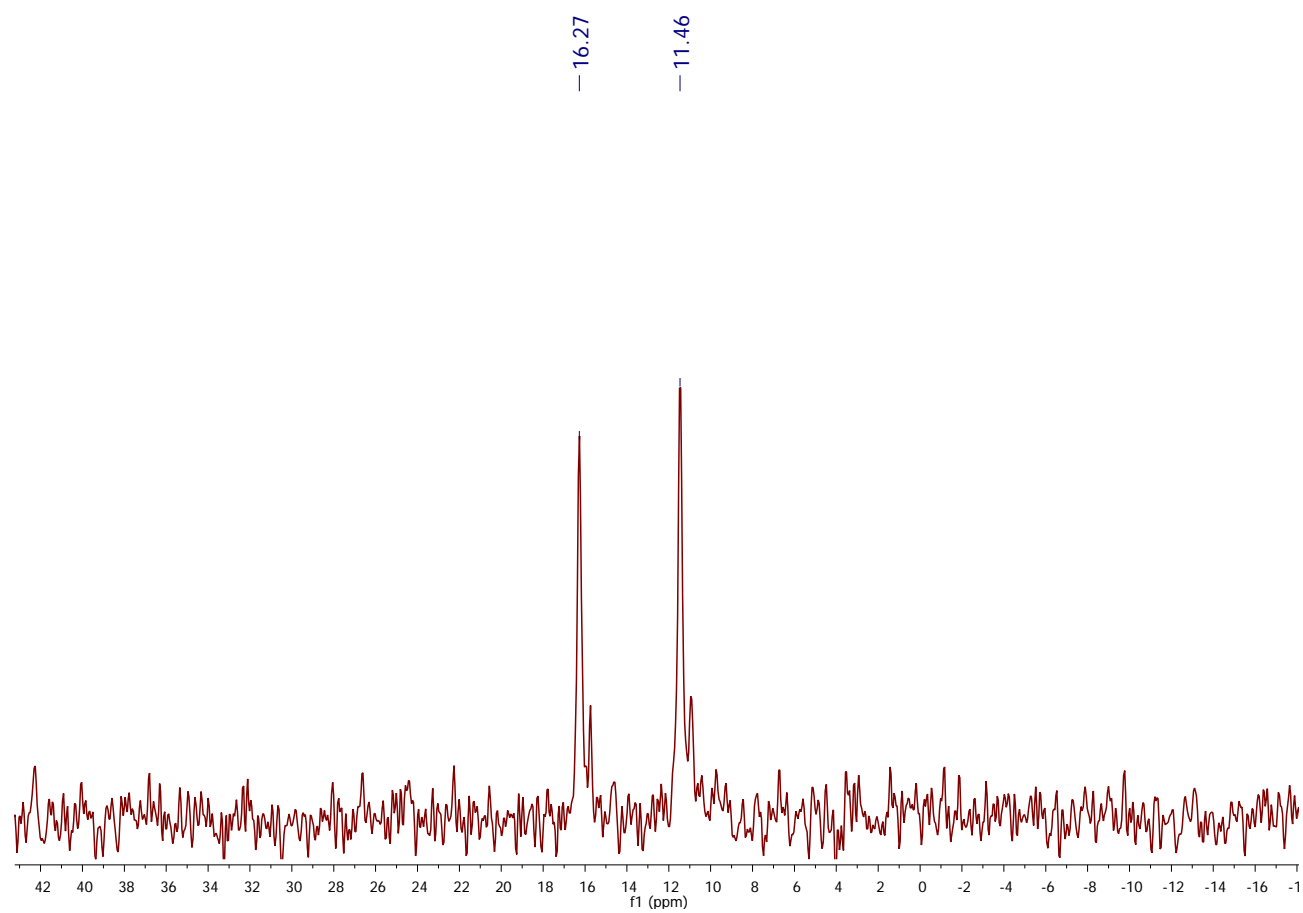

**Figure S5.** Thermogravimetric Analysis of the ligand Na[1] and the 1-MNP.

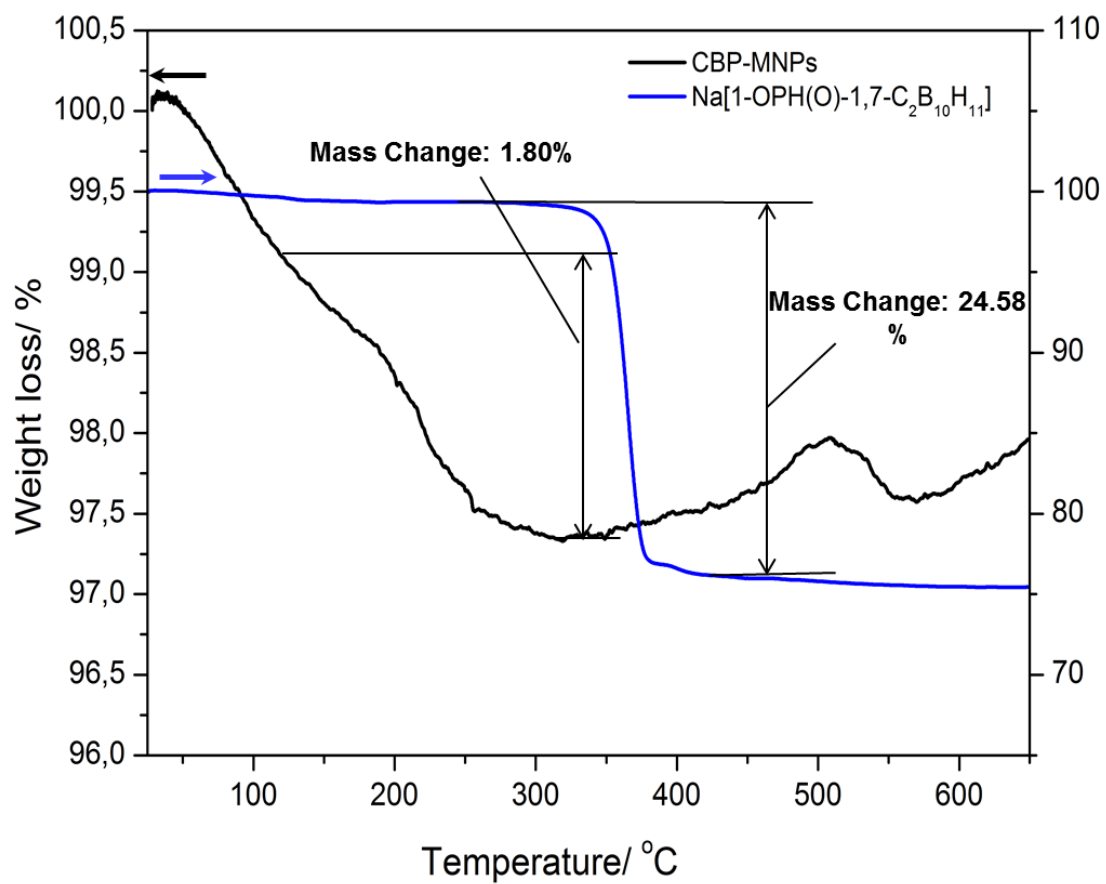

Supplement: Supplementary file 1 [file 10036012]
